# Supplementary material for: Promoting Pollinating Insects in Intensive Agricultural Matrices: Field-Scale Experimental Manipulation of Hay-Meadow Mowing Regimes and Its Effects on Bees
Source: PLoS One. 2014 Jan 9;9(1):e85635. doi: 10.1371/journal.pone.0085635 (PMC3887108; doi:10.1371/journal.pone.0085635)
Supplement: Appendix S3 — List of the species of wild bees identified per area. The nomenclature follows the one proposed in the identification keys of Félix Amiet. (XLS) [file pone.0085635.s003.xls]

## Sheet: species_table
Supporting information S3
Table S3. Number of individuals of bee species captured in June and July within the 12 geographic replicates (3 sites per replicate).
Species	Avenches	Belp	Coffrane	Cousset	Diegten	Grossaffoltern	Hindelbank	Huttwil	Lupfig	Nyon	Orbe	Wohlen
Apis mellifera (honey bees)	12	10	27	14	21	21	17	21	26	21	61	28
Bombus barbutellus	1	0	0	0	0	0	0	0	0	0	3	0
Megabombus group	2	1	1	5	0	0	1	0	0	2	5	1
Bombus lapidarius	3	0	4	0	1	3	0	0	6	2	8	1
Thoracobombus group	1	2	3	1	3	1	3	0	2	2	4	2
Bombus pratorum	0	0	0	0	0	0	0	2	0	0	0	0
Bombus ruderarius	0	0	0	0	0	0	0	0	0	0	3	0
Bombus rupestris	0	0	1	0	0	0	0	0	0	0	2	0
Bombus sylvestris	0	0	0	0	0	0	1	0	0	0	2	0
Bombus sensus stricto group	10	4	13	9	8	7	5	4	9	7	12	1
Andrena alfkenella	0	1	0	0	0	0	0	0	0	0	1	0
Andrena cf.trimmerana	0	0	0	0	0	0	0	0	0	1	0	0
Andrena chrysosceles	0	1	0	0	1	0	0	0	0	0	0	0
Andrena curvungula	0	0	3	0	0	0	0	0	0	0	0	0
Andrena dorsata	0	0	0	0	1	0	2	0	0	4	0	0
Andrena flavipes	4	1	1	1	0	0	0	0	1	1	0	1
Andrena fulvata	0	0	0	0	0	0	0	0	0	0	1	0
Andrena humilis	0	0	0	1	0	0	0	0	0	0	2	0
Andrena minutula	0	0	0	0	1	0	0	0	0	1	1	0
Andrena ovatula group	0	0	0	1	0	0	1	0	0	0	0	0
Chelostoma campanularum	0	2	0	0	0	0	0	0	0	0	0	0
Chelostoma rapunculi	0	0	0	0	0	0	0	1	0	0	0	0
Eucera longicornis	0	0	0	0	0	0	0	1	0	0	0	0
Halictus confusus	0	0	0	0	0	0	0	0	0	1	0	0
Halictus maculatus	1	6	1	0	0	0	0	0	0	2	1	0
Halictus rubicundus	0	0	0	2	0	3	0	1	0	0	4	0
Halictus scabiosae	6	0	1	10	0	2	0	0	2	1	1	2
Halictus subauratus	1	0	0	0	0	0	0	0	0	0	0	0
Halictus tumulorum	4	7	6	18	12	6	2	1	22	32	8	1
Halictus.simplex group	8	16	7	13	14	11	0	0	4	33	63	8
Hylaeus annularis	0	0	0	0	0	1	0	0	0	0	1	0
Hylaeus confusus	0	0	0	0	0	1	1	0	0	0	0	0
Hylaeus kahri	0	1	0	0	0	0	2	0	0	0	0	1
Hylaeus punctulatissimus	0	1	0	0	0	0	0	0	0	0	0	0
Hylaeus sinatus	0	0	0	0	1	0	0	0	0	0	0	0
Lasioglossum aeratum	0	0	0	0	0	0	0	0	0	0	2	0
Lasioglossum calceatum	6	4	7	39	4	4	1	8	1	12	58	0
Lasioglossum convexiusculum	1	0	0	0	0	0	0	0	0	0	0	0
Lasioglossum fulvicorne	0	0	2	1	0	0	0	1	0	0	5	0
Lasioglossum glabriusculum	0	0	0	0	3	0	0	0	7	8	0	0
Lasioglossum griseolum	0	0	0	0	0	0	0	0	0	3	0	0
Lasioglossum laticeps	57	0	10	4	0	0	0	0	1	21	13	4
Lasioglossum lativentre	3	0	2	2	0	0	0	0	1	0	0	0
Lasioglossum leucopus	0	0	0	0	0	1	0	0	0	0	0	0
Lasioglossum leucozonium	0	1	2	2	0	5	1	0	1	1	8	0
Lasioglossum lineare	15	0	0	1	0	0	0	0	0	5	1	0
Lasioglossum lucidulum	2	0	0	0	0	0	0	0	0	0	0	0
Lasioglossum malachurum	197	23	0	20	5	19	1	0	3	64	11	3
Lasioglossum morio	10	0	2	3	2	0	0	1	0	4	0	2
Lasioglossum nigripes	2	3	0	0	0	0	1	2	0	0	0	0
Lasioglossum pauxillum	20	1	2	6	24	9	0	0	3	21	4	2
Lasioglossum politum	5	0	0	4	0	0	0	0	0	0	0	0
Lasioglossum punctatissimum	1	0	0	4	0	0	0	0	0	0	0	0
Lasioglossum villosulum	4	0	0	3	0	0	0	0	0	2	5	0
Lasioglossum zonulum	2	11	16	15	5	69	16	12	9	3	1	22
Megachile circumcincta	0	0	0	0	0	0	0	0	0	1	0	0
Megachile ericetorum	1	1	0	0	0	0	0	0	0	0	0	0
Melitta leporina	0	0	0	1	0	1	0	0	0	0	2	0
Osmia adunca	0	0	0	0	0	0	0	0	0	0	0	1
Panurgus calcaratus	0	0	0	0	0	0	0	2	0	0	0	0
Sphecodes ephippius	0	0	0	1	0	0	0	0	0	0	0	0
Xylocopa valga	0	0	0	0	0	0	0	0	0	1	0	0
Xylocopa violacea	1	0	0	0	0	0	0	0	0	0	0	0
unidentified	4	0	1	3	2	1	0	0	2	4	1	3
