# Supplementary material for: Promoting Pollinating Insects in Intensive Agricultural Matrices: Field-Scale Experimental Manipulation of Hay-Meadow Mowing Regimes and Its Effects on Bees
Source: PubMed Central journal article supplement (PMC3887108; doi:10.1371/journal.pone.0085635), 2014-01-09

Sampling points

- 15 July
- Control
- Refuge

Borders

Water bodies

Lowland

Mountainous areas

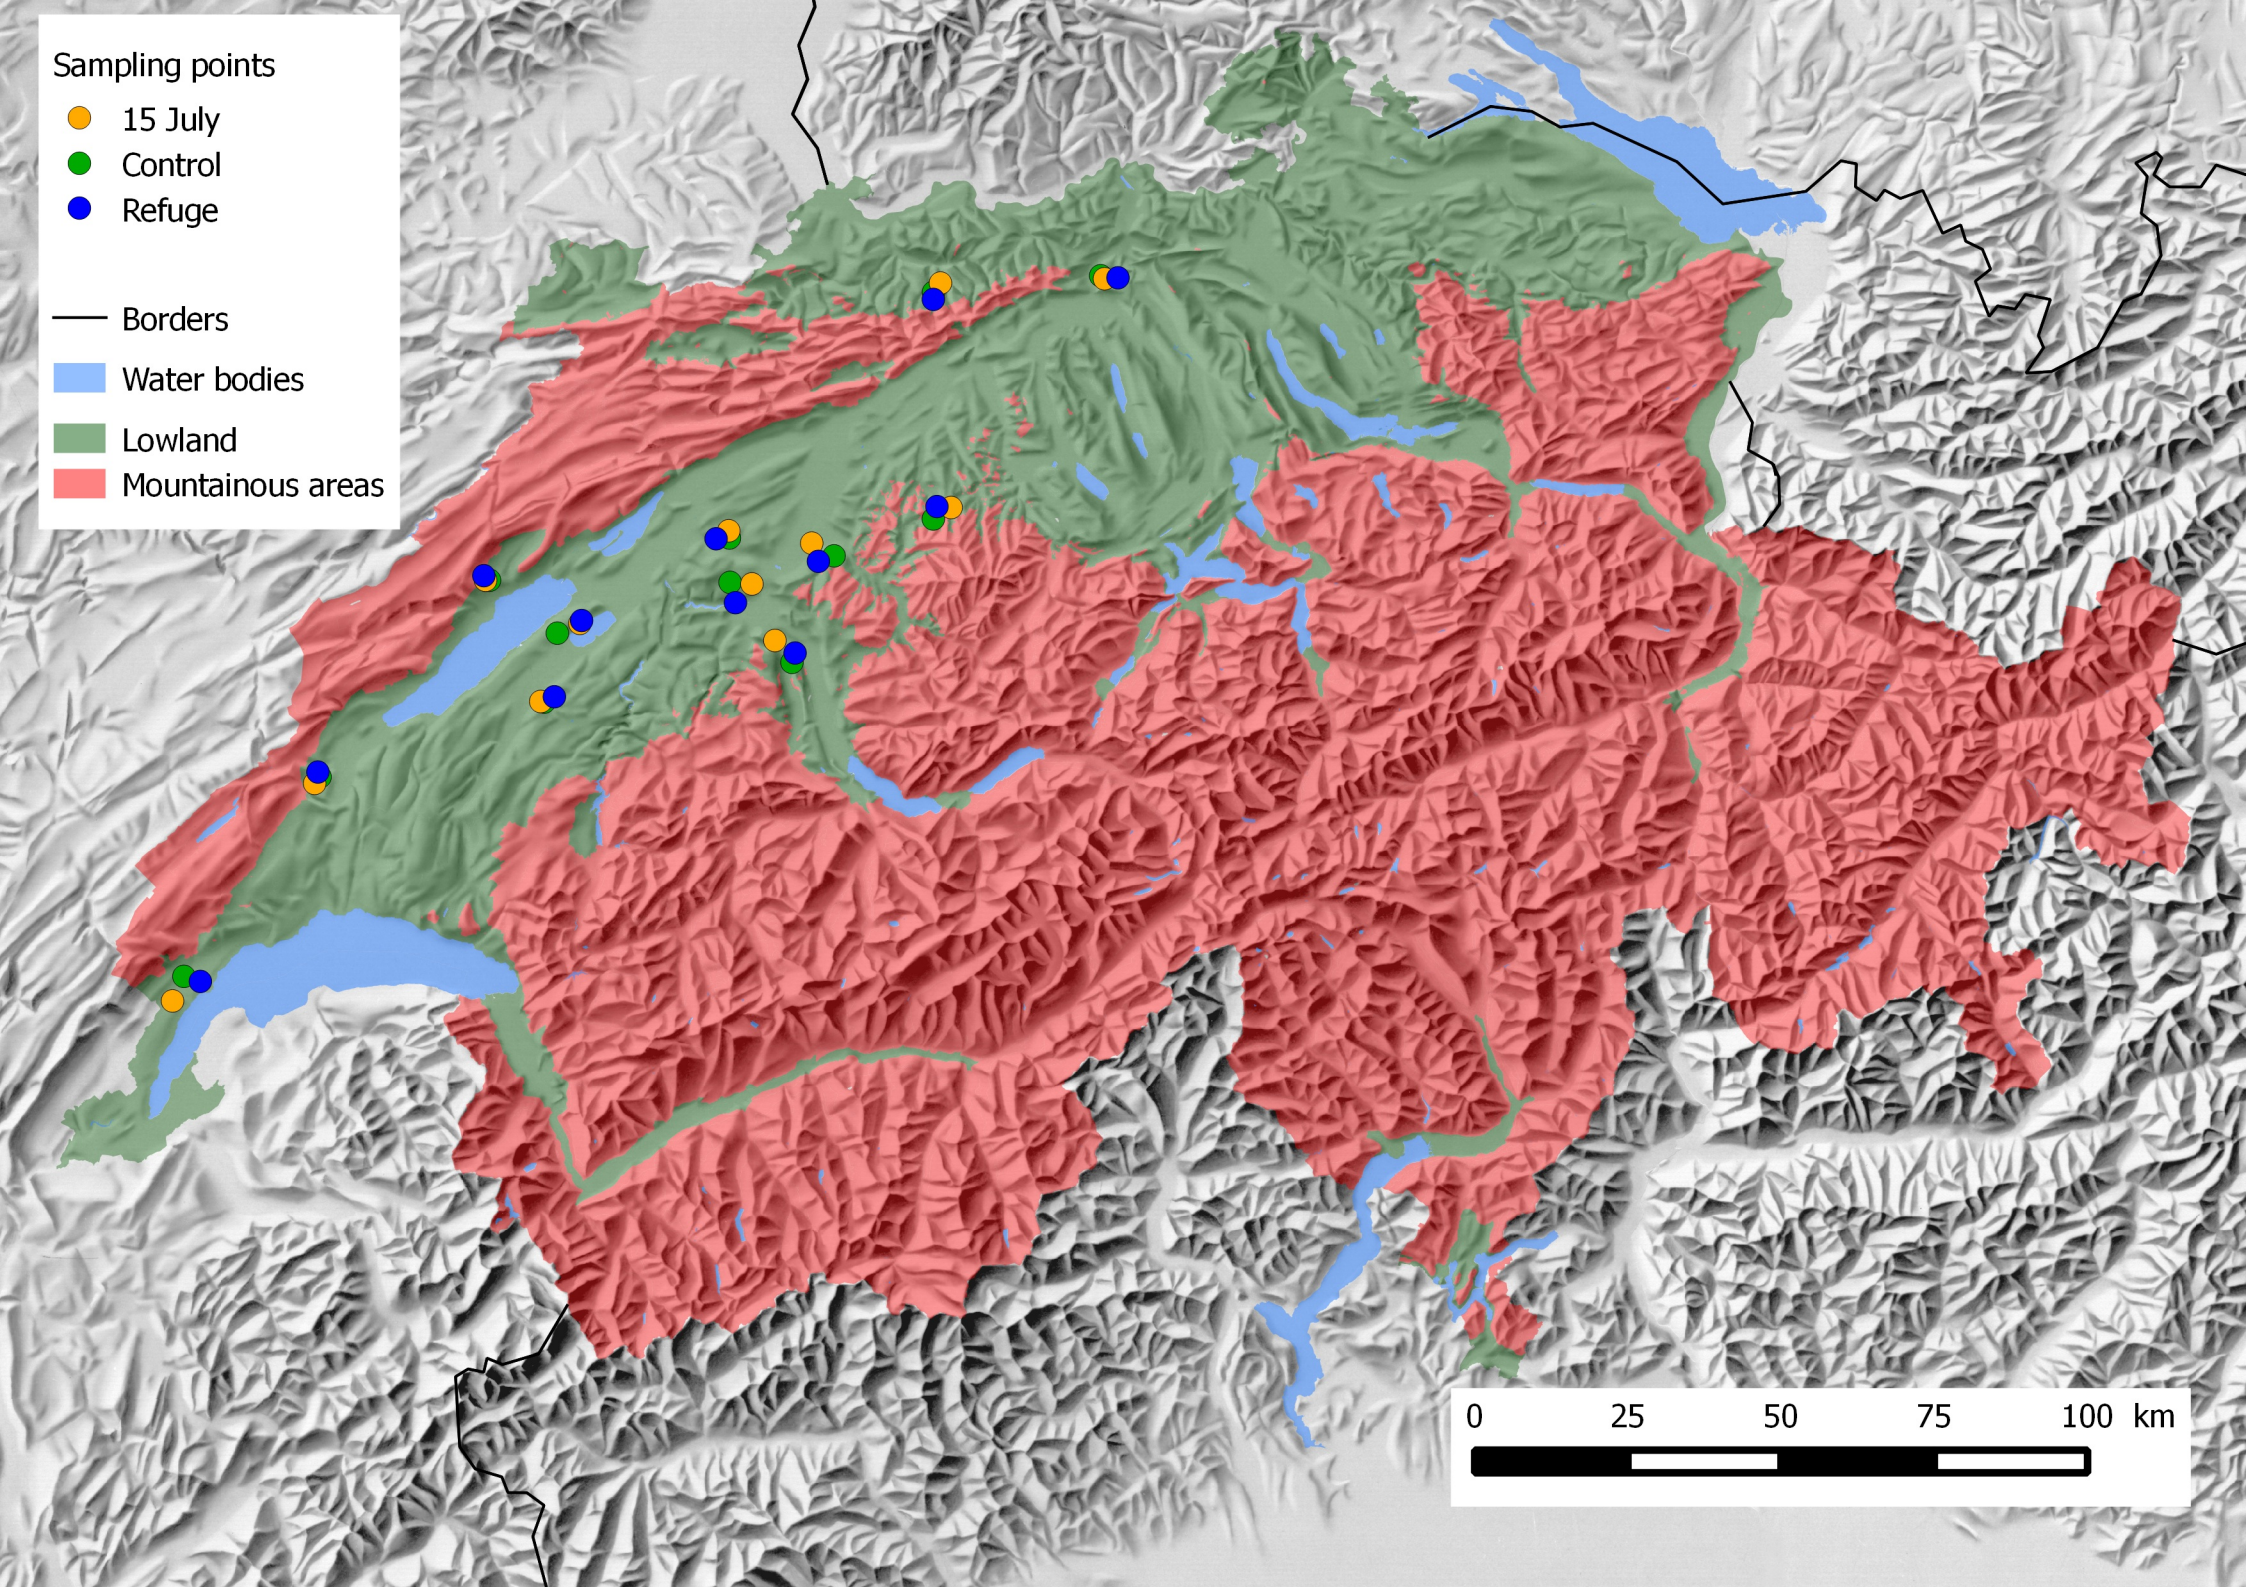

Supplement: pone.0085635.s001.pdf [file pone.0085635.s001.pdf]
